# Supplementary material for: Thermal stability and crystallochemical analysis for CoII-based coordination polymers with TPP and TPPS porphyrins
Source: Royal Society of Chemistry journal article supplement (doi:10.1039/c3ce40161h), 2013-01-01
Supplement: c3ce40161h.pdf [file c3ce40161h.pdf]

## ELECTRONIC SUPPLEMENTARY INFORMATION

### Thermal stability and crystallochemical analysis for Co<sup>II</sup>-based coordination polymers with TPP and TPPS porphyrins

Arkaitz Fidalgo-Marijuan,<sup>a</sup> Gotzone Barandika,<sup>\*b</sup> Begoña Bazán,<sup>a</sup> Miren Karmele Urtiaga<sup>a</sup> and María Isabel Arriortua<sup>a</sup>

<sup>a</sup> Departamento de Mineralogía y Petrología, Facultad de Ciencia y Tecnología, Universidad del País Vasco (UPV/EHU), Apdo. 644, 48080 Bilbao, Spain. Fax: +34 946 013 500; Tel: +34 946 015 984; E-mail: arkaitz.fidalgo@ehu.es, bego.bazan@ehu.es, karmele.urtiaga@ehu.es, maribel.arriortua@ehu.es

<sup>b</sup> Departamento de Química Inorgánica, Facultad de Farmacia, Universidad del País Vasco (UPV/EHU), Paseo de la Universidad 7, 01006 Vitoria-Gasteiz, Spain. Fax: +34 945 013 014; Tel: +34 945 013 080; E-mail: gotzone.barandika@ehu.es

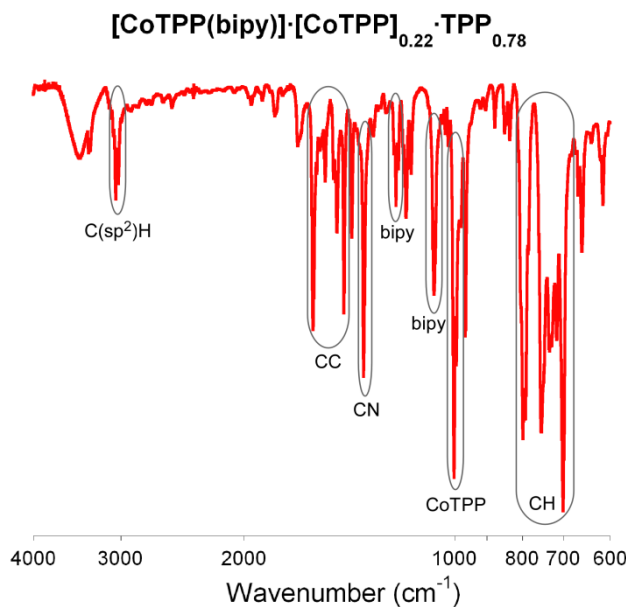

**Fig. S1** IR spectra for compound **1**. The following bands (cm<sup>-1</sup>) are marked: 3052 and 3028 (C(sp<sup>2</sup>)H), 1596-1441 (CC), 1349 (CN), 1210 and 1069 (bipy), 1000 (CoTPP) and 795-700 (CH).

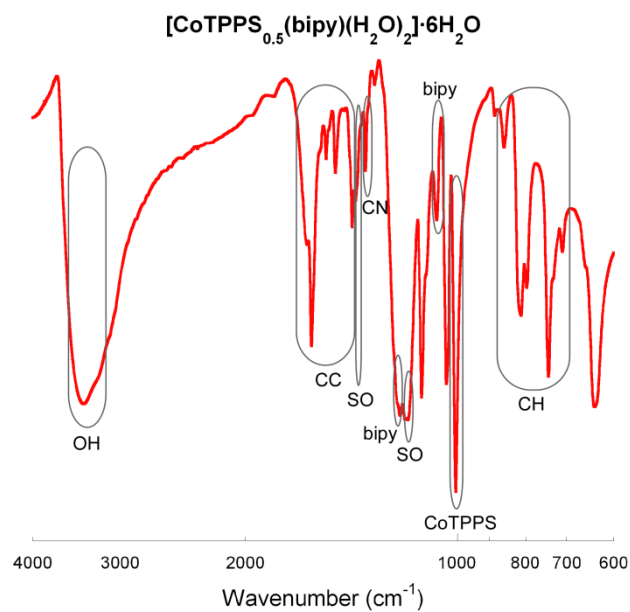

**Fig. S2** IR spectra for compound **2**. The following bands ( $\text{cm}^{-1}$ ) are marked: 3397 (OH), 1624-1410 (CC), 1394 and 1174 (SO), 1349 (CN), 1208 and 1076 (bipy), 1000 (CoTPPS) and 863-744 (CH).

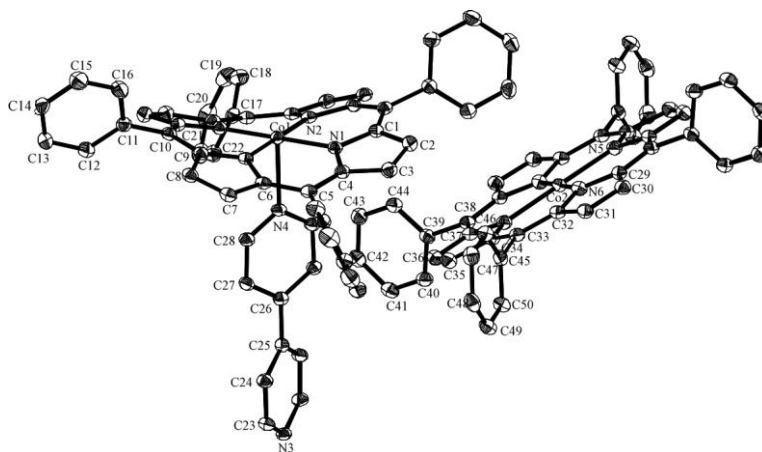

**Fig. S3** Thermal ellipsoid plot (50% of probability) for compound **1**.

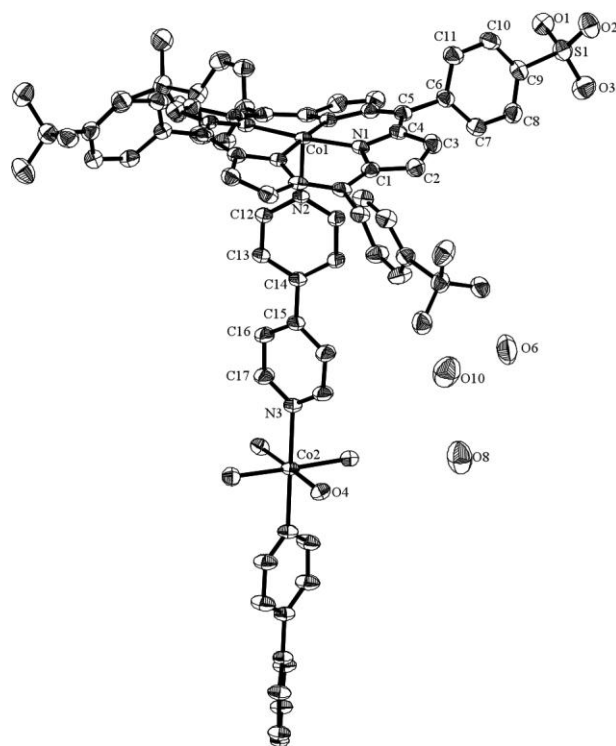

**Fig. S4** Thermal ellipsoid plot (50% of probability) for compound **2**.

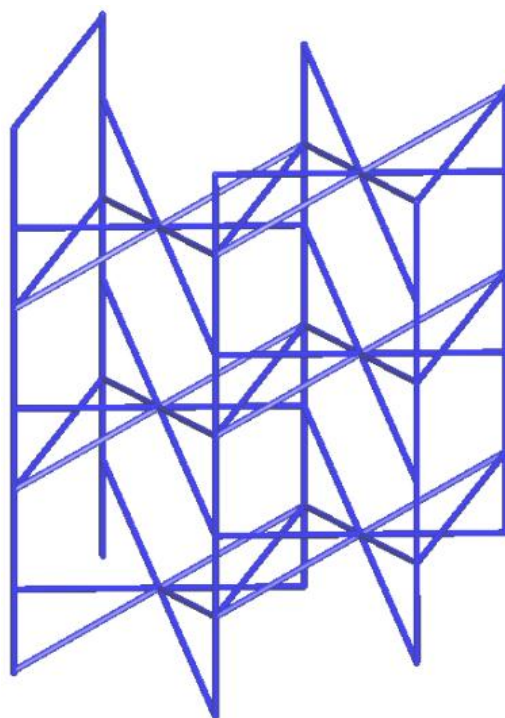

**Fig. S5** Topology of the net for compound **1**.

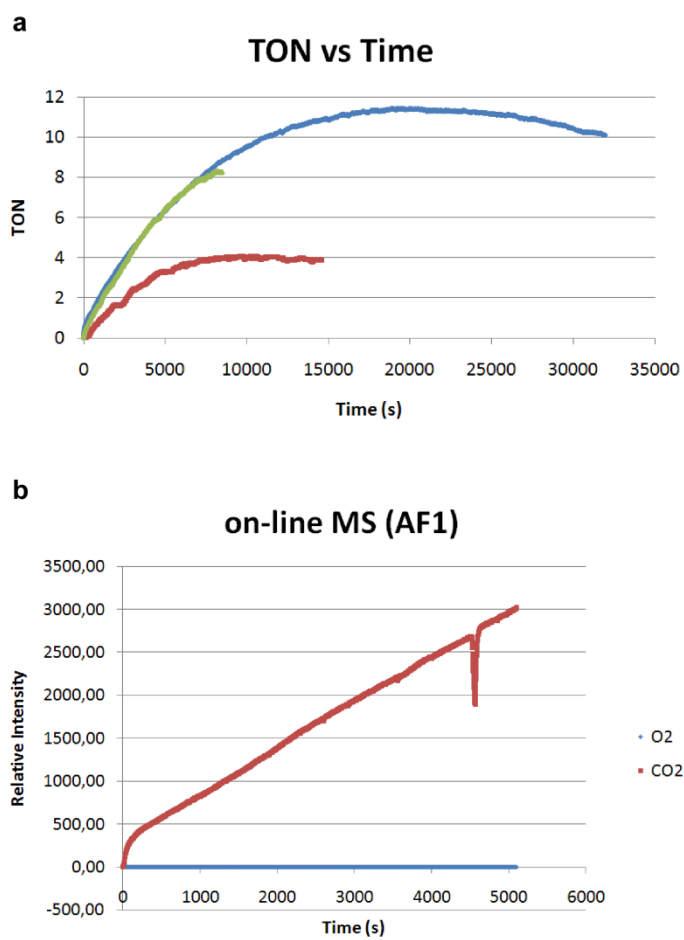

**Fig. S6** \_Three gas generation manometry experiments (a) and Online-MS study (b) for compound **1**.

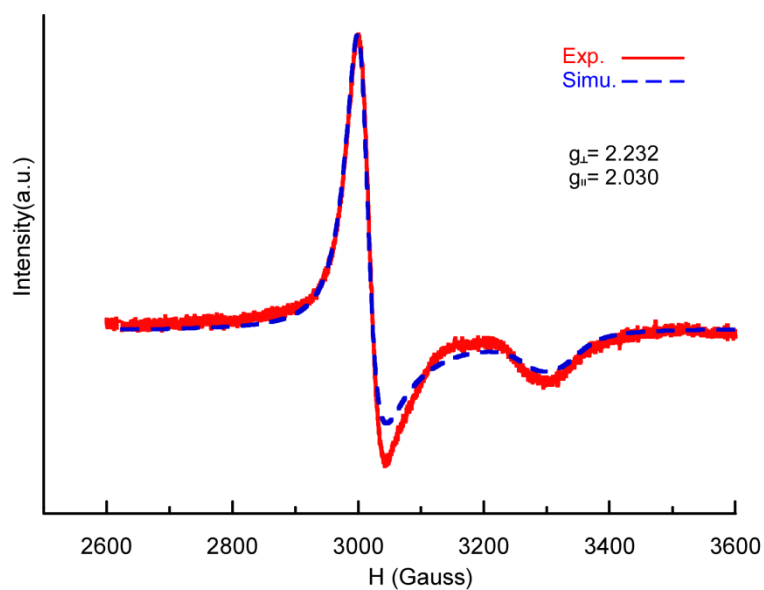

**Fig. S7** X-band EPR spectrum at 5° K for compound **1**. Red line corresponds to the observed spectra and blue dashed line to the simulated one.

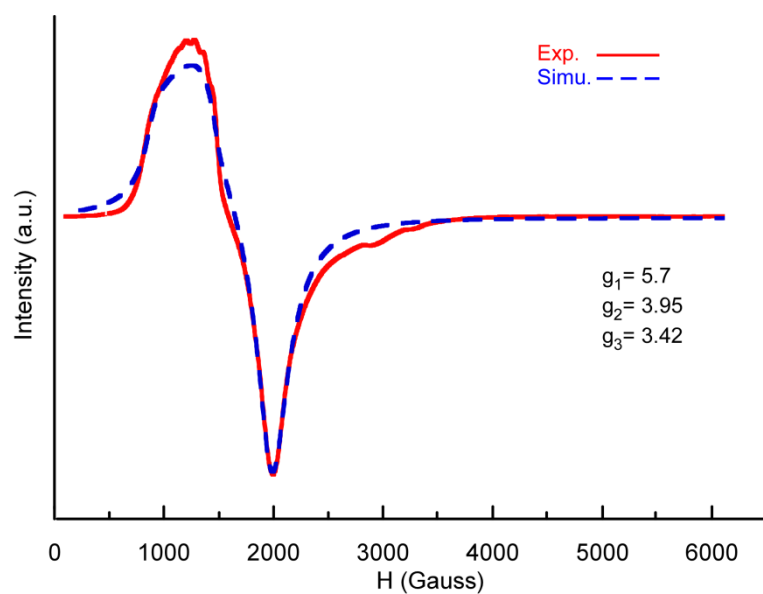

**Fig. S8** X-band EPR spectrum at 5° K for compound **2**. Red line corresponds to the observed spectra and blue dashed line to the simulated one.

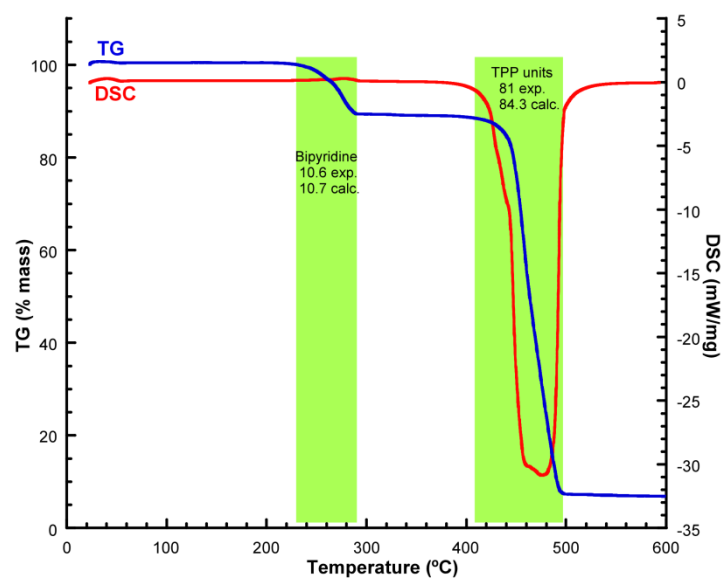

**Fig. S9** Thermogravimetric analysis for compound **1**. Green ranges show the weight loss intervals.

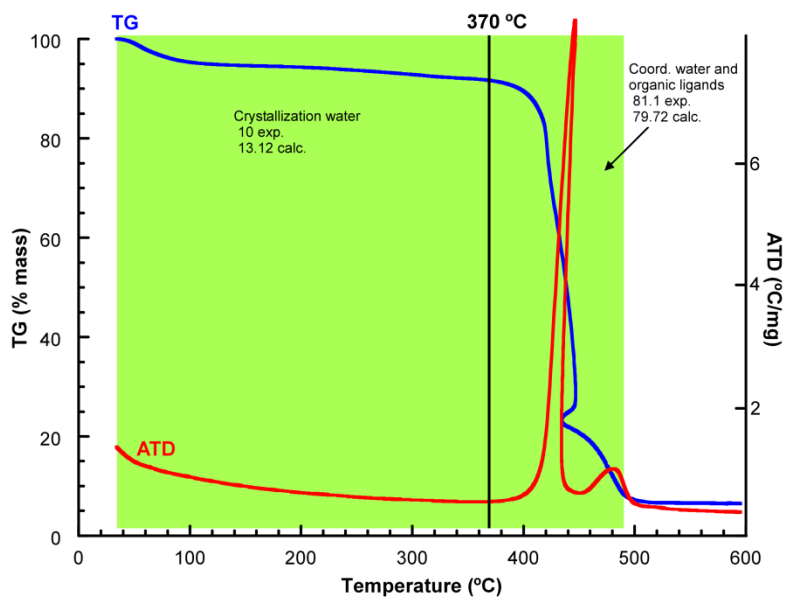

**Fig. S10** Thermogravimetric analysis for compound **2**. Green ranges show the weight loss intervals.

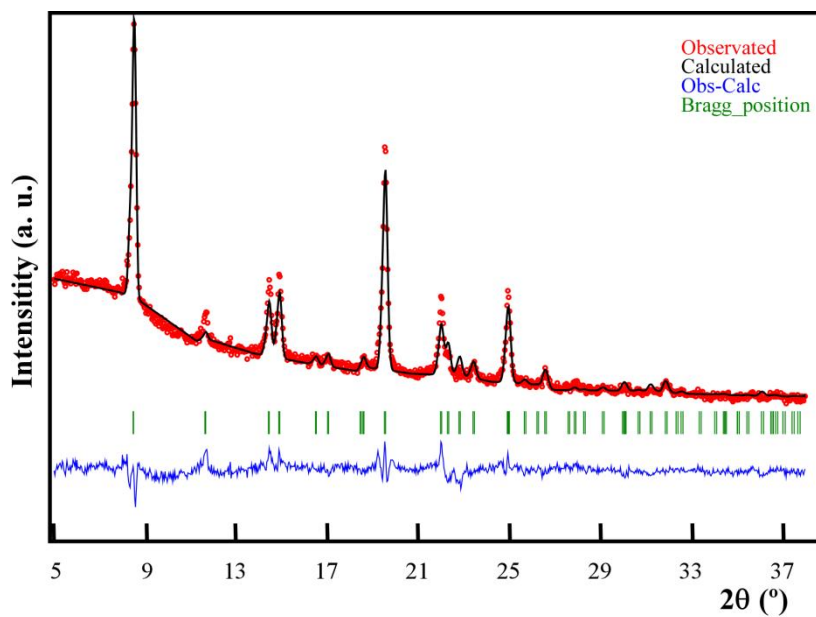

**Fig. S11** Observed (red), calculated (black) and difference (blue) X-ray powder diffraction patterns for CoTPP.

**Table S1** Fractional atomic coordinates ( $\times 10^4$ ) and equivalent thermal factors ( $\times 10^3$ ) for compound **1**.

| Atoms | X       | Y        | Z       | $U_{eq}, \text{\AA}^2$ |
|-------|---------|----------|---------|------------------------|
| C(1)  | 4305(1) | 4398(1)  | 1441(1) | 20(1)                  |
| C(2)  | 4327(1) | 4363(1)  | 840(1)  | 23(1)                  |
| C(3)  | 4826(1) | 4015(1)  | 735(1)  | 23(1)                  |
| C(4)  | 5119(1) | 3889(1)  | 1270(1) | 20(1)                  |
| C(5)  | 5667(1) | 3676(1)  | 1336(1) | 20(1)                  |
| C(6)  | 5965(1) | 3844(1)  | 1839(1) | 19(1)                  |
| C(7)  | 6539(1) | 3850(1)  | 1907(1) | 22(1)                  |
| C(8)  | 6674(1) | 4204(1)  | 2434(1) | 21(1)                  |
| C(9)  | 6183(1) | 4351(1)  | 2706(1) | 18(1)                  |
| C(10) | 6157(1) | 4580(1)  | 3277(1) | 20(1)                  |
| C(11) | 6656(1) | 4997(1)  | 3583(1) | 21(1)                  |
| C(12) | 6966(1) | 4326(2)  | 3952(1) | 28(1)                  |
| C(13) | 7440(1) | 4745(2)  | 4207(1) | 30(1)                  |
| C(14) | 7610(1) | 5835(2)  | 4100(1) | 28(1)                  |
| C(15) | 7303(1) | 6508(2)  | 3736(1) | 32(1)                  |
| C(16) | 6829(1) | 6100(2)  | 3479(1) | 28(1)                  |
| C(17) | 5945(1) | 3307(1)  | 832(1)  | 21(1)                  |
| C(18) | 6325(1) | 3981(2)  | 593(1)  | 27(1)                  |
| C(19) | 6579(1) | 3596(2)  | 127(1)  | 33(1)                  |
| C(20) | 6455(1) | 2540(2)  | -101(1) | 33(1)                  |
| C(21) | 6075(1) | 1864(2)  | 131(1)  | 31(1)                  |
| C(22) | 5821(1) | 2247(2)  | 595(1)  | 26(1)                  |
| C(23) | 5431(1) | 6731(1)  | 2382(1) | 21(1)                  |
| C(24) | 5451(1) | 7913(1)  | 2378(1) | 21(1)                  |
| C(25) | 5000    | 8530(2)  | 2500    | 19(1)                  |
| C(26) | 5000    | -212(2)  | 2500    | 19(1)                  |
| C(27) | 4539(1) | 405(1)   | 2349(1) | 21(1)                  |
| C(28) | 4560(1) | 1587(1)  | 2351(1) | 21(1)                  |
| C(29) | 7373(1) | 3488(1)  | 6166(1) | 20(1)                  |
| C(30) | 6992(1) | 3545(1)  | 6587(1) | 22(1)                  |
| C(31) | 6529(1) | 3085(1)  | 6368(1) | 22(1)                  |
| C(32) | 6612(1) | 2729(1)  | 5808(1) | 20(1)                  |
| C(33) | 6236(1) | 2182(1)  | 5453(1) | 21(1)                  |
| C(34) | 6332(1) | 1755(1)  | 4923(1) | 21(1)                  |
| C(35) | 5926(1) | 1236(1)  | 4549(1) | 24(1)                  |
| C(36) | 6167(1) | 935(1)   | 4082(1) | 24(1)                  |
| C(37) | 6721(1) | 1270(1)  | 4169(1) | 21(1)                  |
| C(38) | 7097(1) | 1139(1)  | 3769(1) | 21(1)                  |
| C(39) | 6941(1) | 597(1)   | 3217(1) | 20(1)                  |
| C(40) | 6931(1) | -584(1)  | 3162(1) | 24(1)                  |
| C(41) | 6848(1) | -1082(2) | 2639(1) | 25(1)                  |
| C(42) | 6765(1) | -414(2)  | 2165(1) | 25(1)                  |
| C(43) | 6755(1) | 760(2)   | 2218(1) | 26(1)                  |
| C(44) | 6848(1) | 1261(1)  | 2742(1) | 24(1)                  |
| C(45) | 5697(1) | 2003(1)  | 5672(1) | 21(1)                  |
| C(46) | 5351(1) | 2914(2)  | 5746(1) | 24(1)                  |
| C(47) | 4857(1) | 2731(2)  | 5964(1) | 28(1)                  |
| C(48) | 4706(1) | 1646(2)  | 6111(1) | 27(1)                  |
| C(49) | 5048(1) | 740(2)   | 6045(1) | 26(1)                  |
| C(50) | 5541(1) | 916(1)   | 5825(1) | 24(1)                  |
| Co(1) | 5000    | 4129(1)  | 2500    | 16(1)                  |
| Co(2) | 7500    | 2500     | 5000    | 17(1)                  |
| N(1)  | 4794(1) | 4125(1)  | 1695(1) | 18(1)                  |
| N(2)  | 5756(1) | 4126(1)  | 2338(1) | 18(1)                  |
| N(3)  | 5000    | 6130(2)  | 2500    | 19(1)                  |

|      |         |         |         |       |
|------|---------|---------|---------|-------|
| N(4) | 5000    | 2181(2) | 2500    | 19(1) |
| N(5) | 6813(1) | 1771(1) | 4683(1) | 21(1) |
| N(6) | 7129(1) | 2993(1) | 5700(1) | 21(1) |

**Table S2** Anisotropic displacement parameters ( $\text{Å}^2 \times 10^3$ ) for compound **1**.

| Atoms | U11   | U22   | U33   | U23   | U13   | U12   |
|-------|-------|-------|-------|-------|-------|-------|
| C(1)  | 22(1) | 14(1) | 22(1) | 1(1)  | -1(1) | 0(1)  |
| C(2)  | 24(1) | 23(1) | 23(1) | 1(1)  | -1(1) | 1(1)  |
| C(3)  | 24(1) | 22(1) | 23(1) | -1(1) | 2(1)  | 1(1)  |
| C(4)  | 22(1) | 16(1) | 21(1) | -1(1) | 2(1)  | 0(1)  |
| C(5)  | 23(1) | 14(1) | 23(1) | 1(1)  | 3(1)  | -1(1) |
| C(6)  | 20(1) | 13(1) | 24(1) | 1(1)  | 4(1)  | 0(1)  |
| C(7)  | 21(1) | 18(1) | 26(1) | 2(1)  | 3(1)  | 2(1)  |
| C(8)  | 20(1) | 17(1) | 27(1) | 3(1)  | 1(1)  | 0(1)  |
| C(9)  | 16(1) | 13(1) | 26(1) | 2(1)  | 0(1)  | -1(1) |
| C(10) | 21(1) | 14(1) | 25(1) | 1(1)  | 0(1)  | 1(1)  |
| C(11) | 19(1) | 19(1) | 23(1) | -2(1) | 1(1)  | 0(1)  |
| C(12) | 29(1) | 21(1) | 32(1) | 0(1)  | -4(1) | 1(1)  |
| C(13) | 26(1) | 30(1) | 34(1) | -3(1) | -8(1) | 6(1)  |
| C(14) | 20(1) | 30(1) | 34(1) | -9(1) | -2(1) | -2(1) |
| C(15) | 26(1) | 25(1) | 45(1) | 1(1)  | -1(1) | -7(1) |
| C(16) | 24(1) | 23(1) | 36(1) | 6(1)  | -3(1) | -3(1) |
| C(17) | 21(1) | 21(1) | 22(1) | 1(1)  | 1(1)  | 4(1)  |
| C(18) | 29(1) | 25(1) | 29(1) | 3(1)  | 6(1)  | 1(1)  |
| C(19) | 33(1) | 37(1) | 32(1) | 8(1)  | 11(1) | 5(1)  |
| C(20) | 36(1) | 42(1) | 23(1) | 1(1)  | 7(1)  | 14(1) |
| C(21) | 36(1) | 30(1) | 27(1) | -6(1) | -1(1) | 9(1)  |
| C(22) | 26(1) | 24(1) | 26(1) | -1(1) | 1(1)  | 2(1)  |
| C(23) | 20(1) | 16(1) | 26(1) | 1(1)  | 4(1)  | 2(1)  |
| C(24) | 21(1) | 16(1) | 26(1) | 1(1)  | 2(1)  | -2(1) |
| C(25) | 20(1) | 18(1) | 19(1) | 0     | 0(1)  | 0     |
| C(26) | 22(1) | 16(1) | 19(1) | 0     | 3(1)  | 0     |
| C(27) | 20(1) | 16(1) | 26(1) | -1(1) | -1(1) | -2(1) |
| C(28) | 21(1) | 15(1) | 28(1) | 0(1)  | 0(1)  | 1(1)  |
| C(29) | 23(1) | 16(1) | 22(1) | 0(1)  | 1(1)  | 0(1)  |
| C(30) | 24(1) | 18(1) | 24(1) | -2(1) | 2(1)  | 1(1)  |
| C(31) | 23(1) | 19(1) | 23(1) | -1(1) | 2(1)  | 0(1)  |
| C(32) | 22(1) | 15(1) | 23(1) | 0(1)  | 3(1)  | -1(1) |
| C(33) | 23(1) | 16(1) | 24(1) | 2(1)  | 2(1)  | -1(1) |
| C(34) | 22(1) | 17(1) | 23(1) | 2(1)  | 1(1)  | -2(1) |
| C(35) | 22(1) | 24(1) | 26(1) | 0(1)  | 2(1)  | -2(1) |
| C(36) | 23(1) | 23(1) | 24(1) | -1(1) | 0(1)  | -3(1) |
| C(37) | 23(1) | 16(1) | 23(1) | 1(1)  | 0(1)  | -2(1) |
| C(38) | 23(1) | 15(1) | 24(1) | 0(1)  | 1(1)  | 0(1)  |
| C(39) | 18(1) | 19(1) | 24(1) | -1(1) | 2(1)  | -2(1) |
| C(40) | 25(1) | 19(1) | 27(1) | 1(1)  | 2(1)  | -1(1) |
| C(41) | 25(1) | 19(1) | 32(1) | -5(1) | 3(1)  | -2(1) |
| C(42) | 24(1) | 28(1) | 24(1) | -6(1) | 3(1)  | -4(1) |
| C(43) | 26(1) | 27(1) | 24(1) | 1(1)  | 1(1)  | -2(1) |
| C(44) | 25(1) | 20(1) | 26(1) | 0(1)  | 0(1)  | -1(1) |
| C(45) | 21(1) | 23(1) | 19(1) | -2(1) | 0(1)  | -2(1) |
| C(46) | 24(1) | 24(1) | 26(1) | 1(1)  | 0(1)  | -1(1) |
| C(47) | 23(1) | 31(1) | 29(1) | -3(1) | 1(1)  | 4(1)  |
| C(48) | 21(1) | 36(1) | 25(1) | -3(1) | 3(1)  | -6(1) |
| C(49) | 27(1) | 26(1) | 26(1) | -3(1) | 3(1)  | -8(1) |
| C(50) | 24(1) | 21(1) | 26(1) | -3(1) | 3(1)  | -3(1) |



|              |       |       |       |       |      |       |
|--------------|-------|-------|-------|-------|------|-------|
| <b>Co(1)</b> | 16(1) | 14(1) | 19(1) | 0     | 1(1) | 0     |
| <b>Co(2)</b> | 18(1) | 16(1) | 18(1) | -1(1) | 2(1) | -2(1) |
| <b>N(1)</b>  | 19(1) | 14(1) | 22(1) | 0(1)  | 1(1) | 0(1)  |
| <b>N(2)</b>  | 20(1) | 13(1) | 21(1) | 1(1)  | 2(1) | 0(1)  |
| <b>N(3)</b>  | 23(1) | 13(1) | 20(1) | 0     | 1(1) | 0     |
| <b>N(4)</b>  | 22(1) | 13(1) | 23(1) | 0     | 1(1) | 0     |
| <b>N(5)</b>  | 22(1) | 18(1) | 22(1) | 0(1)  | 2(1) | -1(1) |
| <b>N(6)</b>  | 21(1) | 20(1) | 23(1) | 0(1)  | 1(1) | -2(1) |

**Table S3** Fractional atomic coordinates ( $\times 10^4$ ) and isotropic thermal factors ( $\times 10^3$ ) of hydrogen atoms for compound **1**.

| <b>Atoms</b> | <b>X</b> | <b>Y</b> | <b>Z</b> | <b><math>U_{iso}, \text{\AA}^2</math></b> |
|--------------|----------|----------|----------|-------------------------------------------|
| <b>H(2)</b>  | 4047     | 4547     | 571      | 28                                        |
| <b>H(3)</b>  | 4957     | 3879     | 379      | 28                                        |
| <b>H(7)</b>  | 6779     | 3644     | 1633     | 26                                        |
| <b>H(8)</b>  | 7024     | 4331     | 2593     | 25                                        |
| <b>H(12)</b> | 6854     | 3576     | 4031     | 33                                        |
| <b>H(13)</b> | 7649     | 4276     | 4458     | 36                                        |
| <b>H(14)</b> | 7933     | 6116     | 4275     | 34                                        |
| <b>H(15)</b> | 7416     | 7259     | 3660     | 39                                        |
| <b>H(16)</b> | 6622     | 6575     | 3230     | 34                                        |
| <b>H(18)</b> | 6412     | 4704     | 748      | 33                                        |
| <b>H(19)</b> | 6837     | 4060     | -35      | 40                                        |
| <b>H(20)</b> | 6630     | 2279     | -416     | 40                                        |
| <b>H(21)</b> | 5989     | 1142     | -26      | 37                                        |
| <b>H(22)</b> | 5560     | 1783     | 752      | 31                                        |
| <b>H(23)</b> | 5743     | 6327     | 2296     | 25                                        |
| <b>H(24)</b> | 5769     | 8294     | 2293     | 25                                        |
| <b>H(27)</b> | 4214     | 24       | 2247     | 25                                        |
| <b>H(28)</b> | 4245     | 1994     | 2239     | 25                                        |
| <b>H(30)</b> | 7052     | 3849     | 6953     | 26                                        |
| <b>H(31)</b> | 6207     | 3012     | 6553     | 26                                        |
| <b>H(35)</b> | 5562     | 1127     | 4619     | 29                                        |
| <b>H(36)</b> | 6005     | 575      | 3760     | 28                                        |
| <b>H(40)</b> | 6981     | -1049    | 3485     | 28                                        |
| <b>H(41)</b> | 6849     | -1886    | 2606     | 30                                        |
| <b>H(42)</b> | 6714     | -757     | 1807     | 31                                        |
| <b>H(43)</b> | 6685     | 1222     | 1897     | 31                                        |
| <b>H(44)</b> | 6847     | 2064     | 2774     | 28                                        |
| <b>H(46)</b> | 5454     | 3660     | 5648     | 29                                        |
| <b>H(47)</b> | 4624     | 3352     | 6012     | 33                                        |
| <b>H(48)</b> | 4368     | 1523     | 6258     | 33                                        |
| <b>H(49)</b> | 4945     | -3       | 6149     | 32                                        |
| <b>H(50)</b> | 5774     | 292      | 5780     | 28                                        |
| <b>H(1N)</b> | 7279     | 2860     | 5401     | 32                                        |

**Table S4** Fractional atomic coordinates ( $\times 10^4$ ) and equivalent thermal factors ( $\times 10^3$ ) for compound **2**.

| <b>Atoms</b> | <b>X</b> | <b>Y</b> | <b>Z</b> | <b><math>U_{eq}, \text{\AA}^2</math></b> |
|--------------|----------|----------|----------|------------------------------------------|
| <b>C(1)</b>  | 8891(2)  | 1260(2)  | 1328(2)  | 31(1)                                    |
| <b>C(2)</b>  | 8833(2)  | 471(2)   | 1244(2)  | 36(1)                                    |
| <b>C(3)</b>  | 9508(2)  | 219(2)   | 1082(2)  | 37(1)                                    |
| <b>C(4)</b>  | 10003(2) | 844(2)   | 1086(1)  | 31(1)                                    |
| <b>C(5)</b>  | 8297(2)  | 1728(2)  | 1461(1)  | 32(1)                                    |

|       |          |          |          |        |
|-------|----------|----------|----------|--------|
| C(6)  | 7579(2)  | 1366(2)  | 1603(2)  | 34(1)  |
| C(7)  | 7019(2)  | 1305(2)  | 1178(2)  | 38(1)  |
| C(8)  | 6406(2)  | 863(3)   | 1278(2)  | 41(1)  |
| C(9)  | 6343(2)  | 492(2)   | 1815(2)  | 37(1)  |
| C(10) | 6863(2)  | 601(3)   | 2267(2)  | 45(1)  |
| C(11) | 7480(2)  | 1034(3)  | 2154(2)  | 43(1)  |
| C(12) | 10637(2) | 2513(2)  | 56(2)    | 34(1)  |
| C(13) | 10655(2) | 2486(2)  | -560(2)  | 36(1)  |
| C(14) | 10000    | 2500     | -886(2)  | 32(1)  |
| C(15) | 10000    | 2500     | -1548(2) | 32(1)  |
| C(16) | 9446(2)  | 2860(3)  | -1869(2) | 42(1)  |
| C(17) | 9469(2)  | 2846(2)  | -2483(2) | 41(1)  |
| Co(1) | 10000    | 2500     | 1250     | 24(1)  |
| Co(2) | 10000    | 2500     | -3750    | 28(1)  |
| N(1)  | 9612(2)  | 1480(2)  | 1222(1)  | 28(1)  |
| N(2)  | 10000    | 2500     | 366(2)   | 27(1)  |
| N(3)  | 10000    | 2500     | -2794(2) | 32(1)  |
| S(1)  | 5616(1)  | -156(1)  | 1947(1)  | 40(1)  |
| O(1)  | 5997(2)  | -842(2)  | 2111(1)  | 44(1)  |
| O(2)  | 5156(2)  | 120(2)   | 2432(2)  | 51(1)  |
| O(3)  | 5218(2)  | -212(2)  | 1381(2)  | 57(1)  |
| O(4)  | 9417(2)  | 3507(2)  | -3762(1) | 34(1)  |
| O(6)  | 3638(5)  | 9557(6)  | 2426(5)  | 77(3)  |
| O(8)  | 3705(5)  | 10413(6) | 1359(6)  | 85(3)  |
| O(5)  | 5000     | 10000    | 0        | 122(4) |
| O(7)  | 3565(5)  | 10001(7) | 1957(6)  | 102(4) |
| O(9)  | 3637(5)  | 10076(5) | 628(5)   | 84(3)  |
| O(10) | 3541(5)  | 10118(5) | 126(5)   | 87(3)  |

**Table S5** Anisotropic displacement parameters ( $\text{Å}^2 \times 10^3$ ) for compound **2**.

| Atoms | U11   | U22   | U33   | U23   | U13   | U12    |
|-------|-------|-------|-------|-------|-------|--------|
| C(1)  | 37(2) | 35(2) | 21(1) | 0(1)  | -1(1) | -3(1)  |
| C(2)  | 39(2) | 37(2) | 33(2) | -2(1) | -2(1) | -6(2)  |
| C(3)  | 42(2) | 35(2) | 34(2) | -5(2) | -6(2) | 0(2)   |
| C(4)  | 41(2) | 34(2) | 16(1) | -3(1) | -2(1) | 0(2)   |
| C(5)  | 36(2) | 41(2) | 19(2) | -3(1) | 1(1)  | -3(2)  |
| C(6)  | 34(2) | 40(2) | 27(2) | -3(1) | 4(1)  | -2(2)  |
| C(7)  | 40(2) | 46(2) | 29(2) | -1(2) | 4(1)  | 1(2)   |
| C(8)  | 36(2) | 49(2) | 37(2) | -6(2) | 1(1)  | -2(2)  |
| C(9)  | 34(2) | 38(2) | 39(2) | -3(2) | 7(2)  | -5(2)  |
| C(10) | 47(2) | 59(3) | 30(2) | 7(2)  | 1(2)  | -14(2) |
| C(11) | 44(2) | 54(2) | 31(2) | 0(2)  | -1(2) | -11(2) |
| C(12) | 30(2) | 52(2) | 21(2) | 3(1)  | 1(1)  | 1(2)   |
| C(13) | 32(2) | 56(2) | 20(2) | 4(1)  | 1(1)  | -1(2)  |
| C(14) | 35(2) | 42(3) | 18(2) | 0     | 0     | -1(2)  |
| C(15) | 33(2) | 45(3) | 18(2) | 0     | 0     | -4(2)  |
| C(16) | 40(2) | 65(3) | 22(2) | -3(2) | 0(2)  | 10(2)  |
| C(17) | 43(2) | 60(2) | 21(2) | 2(2)  | 0(2)  | 10(2)  |
| Co(1) | 30(1) | 30(1) | 12(1) | 0     | 0     | 0      |
| Co(2) | 35(1) | 35(1) | 15(1) | 0     | 0     | 0      |
| N(1)  | 33(1) | 33(2) | 16(1) | -3(1) | -1(1) | 0(1)   |
| N(2)  | 30(2) | 36(2) | 15(2) | 0     | 0     | -1(2)  |
| N(3)  | 35(2) | 43(2) | 18(2) | 0     | 0     | 0(2)   |
| S(1)  | 40(1) | 35(1) | 45(1) | -1(1) | 1(1)  | -6(1)  |
| O(1)  | 50(2) | 38(2) | 43(2) | -7(1) | 0(1)  | -3(1)  |
| O(2)  | 46(2) | 41(2) | 66(2) | -3(1) | 11(1) | -3(1)  |

|              |        |        |         |        |        |        |
|--------------|--------|--------|---------|--------|--------|--------|
| <b>O(3)</b>  | 57(2)  | 50(2)  | 65(2)   | 9(2)   | -16(2) | -17(2) |
| <b>O(4)</b>  | 39(1)  | 35(1)  | 29(1)   | -2(1)  | -7(1)  | 0(1)   |
| <b>O(6)</b>  | 44(4)  | 97(7)  | 89(7)   | -6(5)  | 6(4)   | -14(4) |
| <b>O(8)</b>  | 57(5)  | 65(6)  | 132(10) | 8(6)   | -15(5) | 7(4)   |
| <b>O(5)</b>  | 110(7) | 75(5)  | 181(10) | -9(6)  | 56(7)  | -12(5) |
| <b>O(7)</b>  | 61(5)  | 120(9) | 125(9)  | -44(8) | -15(5) | 22(5)  |
| <b>O(9)</b>  | 79(6)  | 68(5)  | 105(7)  | 2(5)   | -19(5) | 1(4)   |
| <b>O(10)</b> | 73(5)  | 78(6)  | 110(8)  | -13(5) | -10(5) | -9(4)  |

**Table S6** Fractional atomic coordinates ( $\times 10^4$ ) and isotropic thermal factors ( $\times 10^3$ ) of hydrogen atoms for compound **2**.

| <b>Atoms</b> | <b>X</b> | <b>Y</b> | <b>Z</b> | <b>U<sub>iso</sub>, Å<sup>2</sup></b> |
|--------------|----------|----------|----------|---------------------------------------|
| <b>H(2)</b>  | 8397     | 179      | 1293     | 44                                    |
| <b>H(3)</b>  | 9633     | -279     | 984      | 44                                    |
| <b>H(7)</b>  | 7059     | 1573     | 812      | 46                                    |
| <b>H(8)</b>  | 6032     | 814      | 980      | 49                                    |
| <b>H(10)</b> | 6793     | 380      | 2649     | 54                                    |
| <b>H(11)</b> | 7841     | 1105     | 2460     | 52                                    |
| <b>H(12)</b> | 11093    | 2542     | 269      | 41                                    |
| <b>H(13)</b> | 11120    | 2457     | -763     | 43                                    |
| <b>H(16)</b> | 9057     | 3114     | -1667    | 51                                    |
| <b>H(17)</b> | 9088     | 3096     | -2698    | 50                                    |
| <b>H(20)</b> | 9660(2)  | 3885(2)  | -3758(2) | 34(1)                                 |
| <b>H(21)</b> | 9100(2)  | 3510(3)  | -4022(2) | 65(2)                                 |

**Table S7**  $\pi$ - $\pi$  interactions parameters for compound **1**.

| <i>Face-to-face</i> |            |                      |                             |
|---------------------|------------|----------------------|-----------------------------|
| $C_g^I$             | $C_g^{II}$ | $C_g^I-C_g^{II}$ (Å) | $C_g^I \cdots C_g^{II}$ (°) |
| Cg(7)               | Cg(17)     | 4.041(9)             | 10.77                       |

  

| <i>Edge-to-face</i> |        |             |                      |
|---------------------|--------|-------------|----------------------|
| $X-H$               | $C_g$  | $H-C_g$ (Å) | $X-H \cdots C_g$ (°) |
| C(12)-H(12)         | Cg(13) | 2.51        | 88.10                |
| C(13)-H(13)         | Cg(12) | 2.45        | 88.10                |
| C(18)-H(18)         | Cg(11) | 2.94        | 87.35                |
| C(19)-H(19)         | Cg(8)  | 2.90        | 89.16                |
| C(27)-H(27)         | Cg(16) | 2.68        | 73.96                |
| C(47)-H(47)         | Cg(1)  | 2.97        | 83.64                |

**Table S8** Most significant bond angles (°) and distances (Å) for compound **1** and **2** (distances in bold).

| Compound 1                                  |                 |                 |                 |                 | Compound 2                                                          |                 |                 |
|---------------------------------------------|-----------------|-----------------|-----------------|-----------------|---------------------------------------------------------------------|-----------------|-----------------|
| <b>Co(1). CoN<sub>6</sub> octahedra</b>     |                 |                 |                 |                 | <b>Co(1). CoN<sub>6</sub> octahedra</b>                             |                 |                 |
| <b>Co1</b>                                  | <b>N1</b>       | <b>N2</b>       | <b>N3</b>       | <b>N4</b>       | <b>Co1</b>                                                          | <b>N1</b>       | <b>N2</b>       |
| <b>N4</b>                                   | 89.84(4)        | 89.89(4)        | 180             | <b>2.296(2)</b> | <b>N2</b>                                                           | 88.20(7)        | <b>1.976(4)</b> |
| <b>N3</b>                                   | 90.16(4)        | 90.11(4)        | <b>2.357(2)</b> |                 | <b>N1</b>                                                           | <b>1.963(3)</b> |                 |
| <b>N2</b>                                   | 90.21(6)        | <b>1.962(1)</b> |                 |                 |                                                                     |                 |                 |
| <b>N1</b>                                   | <b>1.966(1)</b> |                 |                 |                 |                                                                     |                 |                 |
| <b>Co(2). CoN<sub>4</sub> square planar</b> |                 |                 |                 |                 | <b>Co(2). CoN<sub>2</sub>(H<sub>2</sub>O)<sub>4</sub> octahedra</b> |                 |                 |
| <b>Co2</b>                                  | <b>N5</b>       | <b>N6</b>       |                 |                 | <b>Co2</b>                                                          | <b>O4</b>       | <b>N3</b>       |
| <b>N6</b>                                   | 90.38(5)        | <b>2.055(1)</b> |                 |                 | <b>N3</b>                                                           | 90.76(6)        | <b>2.137(4)</b> |
| <b>N5</b>                                   | <b>2.032(1)</b> |                 |                 |                 | <b>O4</b>                                                           | <b>2.092(3)</b> |                 |

**Table S9** Hydrogen bond parameters for compound **2**.

| <i>D-H</i> | <i>A</i>           | <i>D-H</i> (Å) | <i>H...A</i> (Å) | <i>O-H...A</i> (°) |
|------------|--------------------|----------------|------------------|--------------------|
| O(4)-H(20) | O(3) <sup>i</sup>  | 0.81(3)        | 1.93(3)          | 173(4)             |
| O(4)-H(21) | O(1) <sup>ii</sup> | 0.82(4)        | 1.89(4)          | 178(4)             |

i) -1/2+x, 1/2+y, 1/2+z; ii) -1/4-y, -1/4+x, 3/4-z

**Table S10** Bond distances (Å) and angles (°) for compound **1**.

| <b>Distances</b>        |          |                           |          |
|-------------------------|----------|---------------------------|----------|
| C(1)-N(1)               | 1.375(2) | C(29)-N(6)                | 1.370(2) |
| C(1)-C(10) <sup>i</sup> | 1.396(2) | C(29)-C(38) <sup>iv</sup> | 1.401(2) |
| C(1)-C(2)               | 1.446(2) | C(29)-C(30)               | 1.436(2) |
| C(2)-C(3)               | 1.357(2) | C(30)-C(31)               | 1.358(2) |
| C(2)-H(2)               | 0.9500   | C(30)-H(30)               | 0.9500   |
| C(3)-C(4)               | 1.445(2) | C(31)-C(32)               | 1.433(2) |
| C(3)-H(3)               | 0.9500   | C(31)-H(31)               | 0.9500   |
| C(4)-N(1)               | 1.374(2) | C(32)-N(6)                | 1.376(2) |
| C(4)-C(5)               | 1.400(2) | C(32)-C(33)               | 1.390(2) |
| C(5)-C(6)               | 1.395(2) | C(33)-C(34)               | 1.402(2) |
| C(5)-C(17)              | 1.496(2) | C(33)-C(45)               | 1.498(2) |
| C(6)-N(2)               | 1.376(2) | C(34)-N(5)                | 1.371(2) |
| C(6)-C(7)               | 1.441(2) | C(34)-C(35)               | 1.449(2) |
| C(7)-C(8)               | 1.353(2) | C(35)-C(36)               | 1.353(2) |
| C(7)-H(7)               | 0.9500   | C(35)-H(35)               | 0.9500   |
| C(8)-C(9)               | 1.442(2) | C(36)-C(37)               | 1.448(2) |
| C(8)-H(8)               | 0.9500   | C(36)-H(36)               | 0.9500   |
| C(9)-N(2)               | 1.372(2) | C(37)-N(5)                | 1.372(2) |
| C(9)-C(10)              | 1.401(2) | C(37)-C(38)               | 1.398(2) |

|                            |          |                           |          |
|----------------------------|----------|---------------------------|----------|
| C(10)-C(1) <sup>i</sup>    | 1.396(2) | C(38)-C(29) <sup>iv</sup> | 1.401(2) |
| C(10)-C(11)                | 1.495(2) | C(38)-C(39)               | 1.498(2) |
| C(11)-C(12)                | 1.388(2) | C(39)-C(44)               | 1.390(2) |
| C(11)-C(16)                | 1.397(2) | C(39)-C(40)               | 1.397(2) |
| C(12)-C(13)                | 1.395(2) | C(40)-C(41)               | 1.388(2) |
| C(12)-H(12)                | 0.9500   | C(40)-H(40)               | 0.9500   |
| C(13)-C(14)                | 1.381(3) | C(41)-C(42)               | 1.388(3) |
| C(13)-H(13)                | 0.9500   | C(41)-H(41)               | 0.9500   |
| C(14)-C(15)                | 1.379(3) | C(42)-C(43)               | 1.390(2) |
| C(14)-H(14)                | 0.9500   | C(42)-H(42)               | 0.9500   |
| C(15)-C(16)                | 1.392(2) | C(43)-C(44)               | 1.393(2) |
| C(15)-H(15)                | 0.9500   | C(43)-H(43)               | 0.9500   |
| C(16)-H(16)                | 0.9500   | C(44)-H(44)               | 0.9500   |
| C(17)-C(18)                | 1.393(2) | C(45)-C(50)               | 1.394(2) |
| C(17)-C(22)                | 1.399(2) | C(45)-C(46)               | 1.399(2) |
| C(18)-C(19)                | 1.397(3) | C(46)-C(47)               | 1.393(2) |
| C(18)-H(18)                | 0.9500   | C(46)-H(46)               | 0.9500   |
| C(19)-C(20)                | 1.386(3) | C(47)-C(48)               | 1.385(3) |
| C(19)-H(19)                | 0.9500   | C(47)-H(47)               | 0.9500   |
| C(20)-C(21)                | 1.385(3) | C(48)-C(49)               | 1.385(3) |
| C(20)-H(20)                | 0.9500   | C(48)-H(48)               | 0.9500   |
| C(21)-C(22)                | 1.391(2) | C(49)-C(50)               | 1.392(2) |
| C(21)-H(21)                | 0.9500   | C(49)-H(49)               | 0.9500   |
| C(22)-H(22)                | 0.9500   | C(50)-H(50)               | 0.9500   |
| C(23)-N(3)                 | 1.340(2) | Co(1)-N(2)                | 1.962(1) |
| C(23)-C(24)                | 1.393(2) | Co(1)-N(2) <sup>i</sup>   | 1.962(1) |
| C(23)-H(23)                | 0.9500   | Co(1)-N(1) <sup>i</sup>   | 1.966(1) |
| C(24)-C(25)                | 1.394(2) | Co(1)-N(1)                | 1.966(1) |
| C(24)-H(24)                | 0.9500   | Co(1)-N(4)                | 2.296(2) |
| C(25)-C(24) <sup>i</sup>   | 1.394(2) | Co(1)-N(3)                | 2.357(2) |
| C(25)-C(26) <sup>ii</sup>  | 1.482(3) | Co(2)-N(5)                | 2.032(1) |
| C(26)-C(27)                | 1.396(2) | Co(2)-N(5) <sup>iv</sup>  | 2.032(1) |
| C(26)-C(27) <sup>i</sup>   | 1.396(2) | Co(2)-N(6)                | 2.055(1) |
| C(26)-C(25) <sup>iii</sup> | 1.482(3) | Co(2)-N(6) <sup>iv</sup>  | 2.055(1) |
| C(27)-C(28)                | 1.393(2) | Co(2)-H(1N)               | 1.22(3)  |
| C(27)-H(27)                | 0.9500   | N(3)-C(23) <sup>i</sup>   | 1.340(2) |
| C(28)-N(4)                 | 1.338(2) | N(4)-C(28) <sup>i</sup>   | 1.338(2) |
| C(28)-H(28)                | 0.9500   | N(6)-H(1N)                | 0.85(3)  |

#### Angles

|                               |          |                                  |          |
|-------------------------------|----------|----------------------------------|----------|
| N(1)-C(1)-C(10) <sup>i</sup>  | 124.7(1) | C(29) <sup>iv</sup> -C(38)-C(39) | 115.3(1) |
| N(1)-C(1)-C(2)                | 110.2(1) | C(44)-C(39)-C(40)                | 118.8(2) |
| C(10) <sup>i</sup> -C(1)-C(2) | 124.9(2) | C(44)-C(39)-C(38)                | 120.3(2) |
| C(3)-C(2)-C(1)                | 106.7(1) | C(40)-C(39)-C(38)                | 120.7(2) |

|                                |          |                                            |           |
|--------------------------------|----------|--------------------------------------------|-----------|
| C(3)-C(2)-H(2)                 | 126.7    | C(41)-C(40)-C(39)                          | 120.5(2)  |
| C(1)-C(2)-H(2)                 | 126.7    | C(41)-C(40)-H(40)                          | 119.8     |
| C(2)-C(3)-C(4)                 | 106.9(1) | C(39)-C(40)-H(40)                          | 119.8     |
| C(2)-C(3)-H(3)                 | 126.5    | C(42)-C(41)-C(40)                          | 120.4(2)  |
| C(4)-C(3)-H(3)                 | 126.5    | C(42)-C(41)-H(41)                          | 119.8     |
| N(1)-C(4)-C(5)                 | 125.4(1) | C(40)-C(41)-H(41)                          | 119.8     |
| N(1)-C(4)-C(3)                 | 110.1(1) | C(41)-C(42)-C(43)                          | 119.5(2)  |
| C(5)-C(4)-C(3)                 | 124.2(2) | C(41)-C(42)-H(42)                          | 120.3     |
| C(6)-C(5)-C(4)                 | 122.9(1) | C(43)-C(42)-H(42)                          | 120.3     |
| C(6)-C(5)-C(17)                | 119.2(1) | C(42)-C(43)-C(44)                          | 120.1(2)  |
| C(4)-C(5)-C(17)                | 117.8(1) | C(42)-C(43)-H(43)                          | 120.0     |
| N(2)-C(6)-C(5)                 | 124.9(1) | C(44)-C(43)-H(43)                          | 120.0     |
| N(2)-C(6)-C(7)                 | 109.6(1) | C(39)-C(44)-C(43)                          | 120.7(2)  |
| C(5)-C(6)-C(7)                 | 125.2(1) | C(39)-C(44)-H(44)                          | 119.6     |
| C(8)-C(7)-C(6)                 | 107.2(1) | C(43)-C(44)-H(44)                          | 119.6     |
| C(8)-C(7)-H(7)                 | 126.4    | C(50)-C(45)-C(46)                          | 118.9(2)  |
| C(6)-C(7)-H(7)                 | 126.4    | C(50)-C(45)-C(33)                          | 119.8(2)  |
| C(7)-C(8)-C(9)                 | 106.8(1) | C(46)-C(45)-C(33)                          | 121.3(2)  |
| C(7)-C(8)-H(8)                 | 126.6    | C(47)-C(46)-C(45)                          | 120.3(2)  |
| C(9)-C(8)-H(8)                 | 126.6    | C(47)-C(46)-H(46)                          | 119.9     |
| N(2)-C(9)-C(10)                | 125.8(1) | C(45)-C(46)-H(46)                          | 119.9     |
| N(2)-C(9)-C(8)                 | 109.9(1) | C(48)-C(47)-C(46)                          | 120.2(2)  |
| C(10)-C(9)-C(8)                | 123.9(1) | C(48)-C(47)-H(47)                          | 119.9     |
| C(1) <sup>1</sup> -C(10)-C(9)  | 122.2(1) | C(46)-C(47)-H(47)                          | 119.9     |
| C(1) <sup>1</sup> -C(10)-C(11) | 120.7(1) | C(49)-C(48)-C(47)                          | 120.0(2)  |
| C(9)-C(10)-C(11)               | 117.1(1) | C(49)-C(48)-H(48)                          | 120.0     |
| C(12)-C(11)-C(16)              | 118.4(2) | C(47)-C(48)-H(48)                          | 120.0     |
| C(12)-C(11)-C(10)              | 123.1(2) | C(48)-C(49)-C(50)                          | 120.1(2)  |
| C(16)-C(11)-C(10)              | 118.6(1) | C(48)-C(49)-H(49)                          | 119.9     |
| C(11)-C(12)-C(13)              | 120.5(2) | C(50)-C(49)-H(49)                          | 119.9     |
| C(11)-C(12)-H(12)              | 119.7    | C(49)-C(50)-C(45)                          | 120.5(2)  |
| C(13)-C(12)-H(12)              | 119.7    | C(49)-C(50)-H(50)                          | 119.7     |
| C(14)-C(13)-C(12)              | 120.8(2) | C(45)-C(50)-H(50)                          | 119.7     |
| C(14)-C(13)-H(13)              | 119.6    | N(2)-Co(1)-N(2) <sup>1</sup>               | 179.77(7) |
| C(12)-C(13)-H(13)              | 119.6    | N(2)-Co(1)-N(1) <sup>1</sup>               | 89.79(6)  |
| C(15)-C(14)-C(13)              | 119.1(2) | N(2) <sup>1</sup> -Co(1)-N(1) <sup>1</sup> | 90.21(6)  |
| C(15)-C(14)-H(14)              | 120.5    | N(2)-Co(1)-N(1)                            | 90.21(6)  |
| C(13)-C(14)-H(14)              | 120.5    | N(2) <sup>1</sup> -Co(1)-N(1)              | 89.79(6)  |
| C(14)-C(15)-C(16)              | 120.7(2) | N(1) <sup>1</sup> -Co(1)-N(1)              | 179.68(8) |
| C(14)-C(15)-H(15)              | 119.7    | N(2)-Co(1)-N(4)                            | 89.89(4)  |
| C(16)-C(15)-H(15)              | 119.7    | N(2) <sup>1</sup> -Co(1)-N(4)              | 89.89(4)  |
| C(15)-C(16)-C(11)              | 120.6(2) | N(1) <sup>1</sup> -Co(1)-N(4)              | 89.84(4)  |
| C(15)-C(16)-H(16)              | 119.7    | N(1)-Co(1)-N(4)                            | 89.84(4)  |
| C(11)-C(16)-H(16)              | 119.7    | N(2)-Co(1)-N(3)                            | 90.11(4)  |

|                                                |          |                                              |           |
|------------------------------------------------|----------|----------------------------------------------|-----------|
| C(18)-C(17)-C(22)                              | 118.8(2) | N(2) <sup>1</sup> -Co(1)-N(3)                | 90.11(4)  |
| C(18)-C(17)-C(5)                               | 122.2(2) | N(1) <sup>1</sup> -Co(1)-N(3)                | 90.16(4)  |
| C(22)-C(17)-C(5)                               | 119.0(2) | N(1)-Co(1)-N(3)                              | 90.16(4)  |
| C(17)-C(18)-C(19)                              | 120.3(2) | N(4)-Co(1)-N(3)                              | 180.0     |
| C(17)-C(18)-H(18)                              | 119.9    | N(5)-Co(2)-N(5) <sup>IV</sup>                | 180.00(4) |
| C(19)-C(18)-H(18)                              | 119.9    | N(5)-Co(2)-N(6)                              | 90.38(5)  |
| C(20)-C(19)-C(18)                              | 120.3(2) | N(5) <sup>IV</sup> -Co(2)-N(6)               | 89.62(5)  |
| C(20)-C(19)-H(19)                              | 119.9    | N(5)-Co(2)-N(6) <sup>IV</sup>                | 89.62(5)  |
| C(18)-C(19)-H(19)                              | 119.9    | N(5) <sup>IV</sup> -Co(2)-N(6) <sup>IV</sup> | 90.38(5)  |
| C(21)-C(20)-C(19)                              | 120.1(2) | N(6)-Co(2)-N(6) <sup>IV</sup>                | 179.9(1)  |
| C(21)-C(20)-H(20)                              | 120.0    | N(5)-Co(2)-H(1N)                             | 91.4(1)   |
| C(19)-C(20)-H(20)                              | 120.0    | N(5) <sup>IV</sup> -Co(2)-H(1N)              | 88.6(1)   |
| C(20)-C(21)-C(22)                              | 119.8(2) | N(6)-Co(2)-H(1N)                             | 4.1(1)    |
| C(20)-C(21)-H(21)                              | 120.1    | N(6) <sup>IV</sup> -Co(2)-H(1N)              | 176.0(1)  |
| C(22)-C(21)-H(21)                              | 120.1    | C(4)-N(1)-C(1)                               | 106.0(1)  |
| C(21)-C(22)-C(17)                              | 120.9(2) | C(4)-N(1)-Co(1)                              | 126.6(1)  |
| C(21)-C(22)-H(22)                              | 119.6    | C(1)-N(1)-Co(1)                              | 127.4(1)  |
| C(17)-C(22)-H(22)                              | 119.6    | C(9)-N(2)-C(6)                               | 106.2(1)  |
| N(3)-C(23)-C(24)                               | 124.0(2) | C(9)-N(2)-Co(1)                              | 126.8(1)  |
| N(3)-C(23)-H(23)                               | 118.0    | C(6)-N(2)-Co(1)                              | 126.9(1)  |
| C(24)-C(23)-H(23)                              | 118.0    | C(23)-N(3)-C(23) <sup>1</sup>                | 116.2(2)  |
| C(23)-C(24)-C(25)                              | 119.4(2) | N(2) <sup>1</sup> -Co(1)-N(1) <sup>1</sup>   | 90.21(6)  |
| C(23)-C(24)-H(24)                              | 120.3    | N(2)-Co(1)-N(1)                              | 90.21(6)  |
| C(25)-C(24)-H(24)                              | 120.3    | N(2) <sup>1</sup> -Co(1)-N(1)                | 89.79(6)  |
| C(24)-C(25)-C(24) <sup>1</sup>                 | 117.0(2) | N(1) <sup>1</sup> -Co(1)-N(1)                | 179.68(8) |
| C(24)-C(25)-C(26) <sup>II</sup>                | 121.5(1) | N(2)-Co(1)-N(4)                              | 89.89(4)  |
| C(24) <sup>1</sup> -C(25)-C(26) <sup>II</sup>  | 121.5(1) | N(2) <sup>1</sup> -Co(1)-N(4)                | 89.89(4)  |
| C(27)-C(26)-C(27) <sup>1</sup>                 | 117.2(2) | N(1) <sup>1</sup> -Co(1)-N(4)                | 89.84(4)  |
| C(27)-C(26)-C(25) <sup>III</sup>               | 121.4(1) | N(1)-Co(1)-N(4)                              | 89.84(4)  |
| C(27) <sup>1</sup> -C(26)-C(25) <sup>III</sup> | 121.4(1) | N(2)-Co(1)-N(3)                              | 90.11(4)  |
| C(28)-C(27)-C(26)                              | 119.3(2) | N(2) <sup>1</sup> -Co(1)-N(3)                | 90.11(4)  |
| C(28)-C(27)-H(27)                              | 120.4    | N(1) <sup>1</sup> -Co(1)-N(3)                | 90.16(4)  |
| C(26)-C(27)-H(27)                              | 120.4    | N(1)-Co(1)-N(3)                              | 90.16(4)  |
| N(4)-C(28)-C(27)                               | 123.6(1) | N(4)-Co(1)-N(3)                              | 180.0     |
| N(4)-C(28)-H(28)                               | 118.2    | N(5)-Co(2)-N(5) <sup>IV</sup>                | 180.00(4) |
| C(27)-C(28)-H(28)                              | 118.2    | N(5)-Co(2)-N(6)                              | 90.38(5)  |
| N(6)-C(29)-C(38) <sup>IV</sup>                 | 126.7(2) | N(5) <sup>IV</sup> -Co(2)-N(6)               | 89.62(5)  |
| N(6)-C(29)-C(30)                               | 108.1(1) | N(5)-Co(2)-N(6) <sup>IV</sup>                | 89.62(5)  |
| C(38) <sup>IV</sup> -C(29)-C(30)               | 125.2(2) | N(5) <sup>IV</sup> -Co(2)-N(6) <sup>IV</sup> | 90.38(5)  |
| C(31)-C(30)-C(29)                              | 107.5(1) | N(6)-Co(2)-N(6) <sup>IV</sup>                | 179.9(1)  |
| C(31)-C(30)-H(30)                              | 126.2    | N(5)-Co(2)-H(1N)                             | 91.4(1)   |
| C(29)-C(30)-H(30)                              | 126.2    | N(5) <sup>IV</sup> -Co(2)-H(1N)              | 88.6(1)   |
| C(30)-C(31)-C(32)                              | 107.9(1) | N(6)-Co(2)-H(1N)                             | 4.1(1)    |
| C(30)-C(31)-H(31)                              | 126.0    | N(6) <sup>IV</sup> -Co(2)-H(1N)              | 175.9(1)  |

|                                 |          |                                |           |
|---------------------------------|----------|--------------------------------|-----------|
| C(32)-C(31)-H(31)               | 126.0    | C(4)-N(1)-C(1)                 | 106.0(1)  |
| N(6)-C(32)-C(33)                | 127.0(1) | C(4)-N(1)-Co(1)                | 126.6(1)  |
| N(6)-C(32)-C(31)                | 107.7(1) | C(1)-N(1)-Co(1)                | 127.4(1)  |
| C(33)-C(32)-C(31)               | 125.2(2) | C(9)-N(2)-C(6)                 | 106.2(1)  |
| C(32)-C(33)-C(34)               | 124.9(2) | C(9)-N(2)-Co(1)                | 126.8(1)  |
| C(32)-C(33)-C(45)               | 116.5(1) | C(6)-N(2)-Co(1)                | 126.9(1)  |
| C(34)-C(33)-C(45)               | 118.5(1) | C(23)-N(3)-C(23) <sup>i</sup>  | 116.2(2)  |
| N(5)-C(34)-C(33)                | 125.6(2) | C(23)-N(3)-Co(1)               | 121.91(9) |
| N(5)-C(34)-C(35)                | 110.5(1) | C(23) <sup>i</sup> -N(3)-Co(1) | 121.91(9) |
| C(33)-C(34)-C(35)               | 123.9(2) | C(28)-N(4)-C(28) <sup>i</sup>  | 117.0(2)  |
| C(36)-C(35)-C(34)               | 106.7(1) | C(28)-N(4)-Co(1)               | 121.5(2)  |
| C(36)-C(35)-H(35)               | 126.6    | C(28) <sup>i</sup> -N(4)-Co(1) | 121.5(2)  |
| C(34)-C(35)-H(35)               | 126.6    | C(34)-N(5)-C(37)               | 105.5(1)  |
| C(35)-C(36)-C(37)               | 106.6(2) | C(34)-N(5)-Co(2)               | 126.8(1)  |
| C(35)-C(36)-H(36)               | 126.7    | C(37)-N(5)-Co(2)               | 127.5(1)  |
| C(37)-C(36)-H(36)               | 126.7    | C(29)-N(6)-C(32)               | 108.8(1)  |
| N(5)-C(37)-C(38)                | 125.5(2) | C(29)-N(6)-Co(2)               | 125.7(1)  |
| N(5)-C(37)-C(36)                | 110.7(1) | C(32)-N(6)-Co(2)               | 125.0(1)  |
| C(38)-C(37)-C(36)               | 123.8(2) | C(29)-N(6)-H(1N)               | 125(2)    |
| C(37)-C(38)-C(29) <sup>iv</sup> | 124.6(2) | C(32)-N(6)-H(1N)               | 127(2)    |
| C(37)-C(38)-C(39)               | 120.2(1) |                                |           |

Symmetry codes: i) -x+1,y,-z+1/2; ii) x,y+1,z; iii) x,y-1,z; iv) -x+3/2,-y+1/2,-z+1

**Table S11** Bond distances (Å) and angles (°) for compound **2**.

**Distances**

|                         |          |                            |          |
|-------------------------|----------|----------------------------|----------|
| C(1)-N(1)               | 1.376(5) | C(14)-C(15)                | 1.481(8) |
| C(1)-C(5)               | 1.391(5) | C(15)-C(16) <sup>iii</sup> | 1.388(5) |
| C(1)-C(2)               | 1.436(5) | C(15)-C(16)                | 1.388(5) |
| C(2)-C(3)               | 1.344(6) | C(16)-C(17)                | 1.374(5) |
| C(2)-H(2)               | 0.9500   | C(16)-H(16)                | 0.9500   |
| C(3)-C(4)               | 1.433(5) | C(17)-N(3)                 | 1.335(5) |
| C(3)-H(3)               | 0.9500   | C(17)-H(17)                | 0.9500   |
| C(4)-N(1)               | 1.377(5) | Co(1)-N(1) <sup>iii</sup>  | 1.963(3) |
| C(4)-C(5) <sup>i</sup>  | 1.388(5) | Co(1)-N(1)                 | 1.963(3) |
| C(5)-C(4) <sup>ii</sup> | 1.388(5) | Co(1)-N(1) <sup>i</sup>    | 1.963(3) |
| C(5)-C(6)               | 1.481(5) | Co(1)-N(1) <sup>ii</sup>   | 1.963(3) |
| C(6)-C(11)              | 1.381(5) | Co(1)-N(2) <sup>ii</sup>   | 1.976(4) |
| C(6)-C(7)               | 1.388(6) | Co(1)-N(2)                 | 1.976(4) |
| C(7)-C(8)               | 1.378(6) | Co(2)-O(4)                 | 2.092(3) |
| C(7)-H(7)               | 0.9500   | Co(2)-O(4) <sup>iii</sup>  | 2.092(3) |



|                            |          |                           |          |
|----------------------------|----------|---------------------------|----------|
| C(8)-C(9)                  | 1.377(6) | Co(2)-O(4) <sup>iv</sup>  | 2.092(3) |
| C(8)-H(8)                  | 0.9500   | Co(2)-O(4) <sup>v</sup>   | 2.092(3) |
| C(9)-C(10)                 | 1.390(6) | Co(2)-N(3) <sup>iv</sup>  | 2.137(4) |
| C(9)-S(1)                  | 1.776(4) | Co(2)-N(3)                | 2.137(4) |
| C(10)-C(11)                | 1.378(6) | N(2)-C(12) <sup>iii</sup> | 1.339(4) |
| C(10)-H(10)                | 0.9500   | N(3)-C(17) <sup>iii</sup> | 1.335(5) |
| C(11)-H(11)                | 0.9500   | S(1)-O(2)                 | 1.451(3) |
| C(12)-N(2)                 | 1.339(4) | S(1)-O(3)                 | 1.458(4) |
| C(12)-C(13)                | 1.379(5) | S(1)-O(1)                 | 1.457(3) |
| C(12)-H(12)                | 0.9500   | O(4)-H(20)                | 0.81(1)  |
| C(13)-C(14)                | 1.384(4) | O(4)-H(21)                | 0.81(1)  |
| C(13)-H(13)                | 0.9500   | O(9)-O(10)                | 1.14(1)  |
| C(14)-C(13) <sup>iii</sup> | 1.384(4) |                           |          |

### Angles

|                               |          |                                               |           |
|-------------------------------|----------|-----------------------------------------------|-----------|
| N(1)-C(1)-C(5)                | 125.9(3) | N(3)-C(17)-H(17)                              | 118.3     |
| N(1)-C(1)-C(2)                | 109.2(3) | C(16)-C(17)-H(17)                             | 118.3     |
| C(5)-C(1)-C(2)                | 124.8(4) | N(1) <sup>iii</sup> -Co(1)-N(1)               | 176.4(1)  |
| C(3)-C(2)-C(1)                | 107.6(3) | N(1) <sup>iii</sup> -Co(1)-N(1) <sup>i</sup>  | 90.058(5) |
| C(3)-C(2)-H(2)                | 126.2    | N(1)-Co(1)-N(1) <sup>i</sup>                  | 90.057(5) |
| C(1)-C(2)-H(2)                | 126.2    | N(1) <sup>iii</sup> -Co(1)-N(1) <sup>ii</sup> | 90.054(5) |
| C(2)-C(3)-C(4)                | 107.2(3) | N(1)-Co(1)-N(1) <sup>ii</sup>                 | 90.057(5) |
| C(2)-C(3)-H(3)                | 126.4    | N(1) <sup>i</sup> -Co(1)-N(1) <sup>ii</sup>   | 176.4(1)  |
| C(4)-C(3)-H(3)                | 126.4    | N(1)-Co(1)-N(2) <sup>ii</sup>                 | 91.80(7)  |
| N(1)-C(4)-C(5) <sup>i</sup>   | 125.1(3) | N(1) <sup>i</sup> -Co(1)-N(2) <sup>ii</sup>   | 88.20(7)  |
| N(1)-C(4)-C(3)                | 109.6(3) | N(1) <sup>ii</sup> -Co(1)-N(2) <sup>ii</sup>  | 88.20(7)  |
| C(5) <sup>i</sup> -C(4)-C(3)  | 124.8(3) | N(1) <sup>iii</sup> -Co(1)-N(2)               | 88.20(7)  |
| C(4) <sup>ii</sup> -C(5)-C(1) | 122.6(3) | N(1)-Co(1)-N(2)                               | 88.20(7)  |
| C(4) <sup>ii</sup> -C(5)-C(6) | 120.4(3) | N(1) <sup>ii</sup> -Co(1)-N(2)                | 91.80(7)  |
| C(1)-C(5)-C(6)                | 116.7(3) | N(1) <sup>ii</sup> -Co(1)-N(2)                | 91.80(7)  |
| C(11)-C(6)-C(7)               | 119.0(4) | N(2) <sup>ii</sup> -Co(1)-N(2)                | 180.0     |
| C(11)-C(6)-C(5)               | 119.5(3) | O(4)-Co(2)-O(4) <sup>iii</sup>                | 178.5(1)  |
| C(7)-C(6)-C(5)                | 121.4(3) | O(4)-Co(2)-O(4) <sup>iv</sup>                 | 90.009(2) |
| C(8)-C(7)-C(6)                | 120.9(4) | O(4) <sup>iii</sup> -Co(2)-O(4) <sup>iv</sup> | 90.014(2) |
| C(8)-C(7)-H(7)                | 119.5    | O(4)-Co(2)-O(4) <sup>v</sup>                  | 90.010(2) |
| C(6)-C(7)-H(7)                | 119.5    | O(4) <sup>iii</sup> -Co(2)-O(4) <sup>v</sup>  | 90.008(2) |
| C(7)-C(8)-C(9)                | 119.1(4) | O(4) <sup>iv</sup> -Co(2)-O(4) <sup>v</sup>   | 178.5(1)  |
| C(7)-C(8)-H(8)                | 120.5    | O(4)-Co(2)-N(3) <sup>iv</sup>                 | 89.24(6)  |
| C(9)-C(8)-H(8)                | 120.5    | O(4) <sup>iii</sup> -Co(2)-N(3) <sup>iv</sup> | 89.24(6)  |

|                                   |          |                                              |          |
|-----------------------------------|----------|----------------------------------------------|----------|
| C(8)-C(9)-C(10)                   | 120.7(4) | O(4) <sup>iv</sup> -Co(2)-N(3) <sup>iv</sup> | 90.76(6) |
| C(8)-C(9)-S(1)                    | 121.5(3) | O(4) <sup>v</sup> -Co(2)-N(3) <sup>iv</sup>  | 90.76(6) |
| C(10)-C(9)-S(1)                   | 117.7(3) | O(4)-Co(2)-N(3)                              | 90.76(6) |
| C(11)-C(10)-C(9)                  | 119.2(4) | O(4) <sup>iii</sup> -Co(2)-N(3)              | 90.76(6) |
| C(11)-C(10)-H(10)                 | 120.4    | O(4) <sup>iv</sup> -Co(2)-N(3)               | 89.24(6) |
| C(9)-C(10)-H(10)                  | 120.4    | O(4) <sup>v</sup> -Co(2)-N(3)                | 89.24(6) |
| C(10)-C(11)-C(6)                  | 120.7(4) | N(3) <sup>iv</sup> -Co(2)-N(3)               | 180.0    |
| C(10)-C(11)-H(11)                 | 119.7    | C(1)-N(1)-C(4)                               | 106.3(3) |
| C(6)-C(11)-H(11)                  | 119.7    | C(1)-N(1)-Co(1)                              | 126.7(2) |
| N(2)-C(12)-C(13)                  | 122.4(3) | C(4)-N(1)-Co(1)                              | 127.0(2) |
| N(2)-C(12)-H(12)                  | 118.8    | C(12) <sup>iii</sup> -N(2)-C(12)             | 117.7(4) |
| C(13)-C(12)-H(12)                 | 118.8    | C(12) <sup>iii</sup> -N(2)-Co(1)             | 121.2(2) |
| C(12)-C(13)-C(14)                 | 120.4(3) | C(12)-N(2)-Co(1)                             | 121.2(2) |
| C(12)-C(13)-H(13)                 | 119.8    | C(17) <sup>iii</sup> -N(3)-C(17)             | 117.3(5) |
| C(14)-C(13)-H(13)                 | 119.8    | C(17) <sup>iii</sup> -N(3)-Co(2)             | 121.4(2) |
| C(13)-C(14)-C(13) <sup>iii</sup>  | 116.5(5) | C(17)-N(3)-Co(2)                             | 121.4(2) |
| C(13)-C(14)-C(15)                 | 121.7(2) | O(2)-S(1)-O(3)                               | 113.0(2) |
| C(13) <sup>iii</sup> -C(14)-C(15) | 121.7(2) | O(2)-S(1)-O(1)                               | 111.7(2) |
| C(16) <sup>iii</sup> -C(15)-C(16) | 117.7(5) | O(3)-S(1)-O(1)                               | 113.0(2) |
| C(16) <sup>iii</sup> -C(15)-C(14) | 121.1(2) | O(2)-S(1)-C(9)                               | 108.6(2) |
| C(16)-C(15)-C(14)                 | 121.2(2) | O(3)-S(1)-C(9)                               | 105.2(2) |
| C(17)-C(16)-C(15)                 | 119.1(4) | O(1)-S(1)-C(9)                               | 104.6(2) |
| C(17)-C(16)-H(16)                 | 120.4    | Co(2)-O(4)-H(20)                             | 117(3)   |
| C(15)-C(16)-H(16)                 | 120.4    | Co(2)-O(4)-H(21)                             | 112(4)   |
| N(3)-C(17)-C(16)                  | 123.4(4) | H(20)-O(4)-H(21)                             | 112(3)   |

Symmetry codes: i)  $-y+5/4, x-3/4, -z+1/4$ ; ii)  $y+3/4, -x+5/4, -z+1/4$ ; iii)  $-x+2, -y+1/2, z+0$ ; iv)  $y+3/4, -x+5/4, -z-3/4$ ;  
 v)  $-y+5/4, x-3/4, -z-3/4$
